# Supplementary material
Source: Springer Nature journal article supplement (https://www.springermedizin.de/resource/supplementary/12955_2012_1041_MOESM1_ESM.pdf/9558612)

a) Child self-report

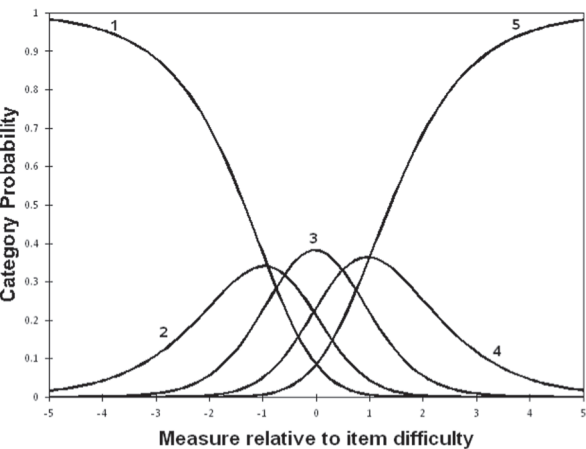

b) Parent proxy-report

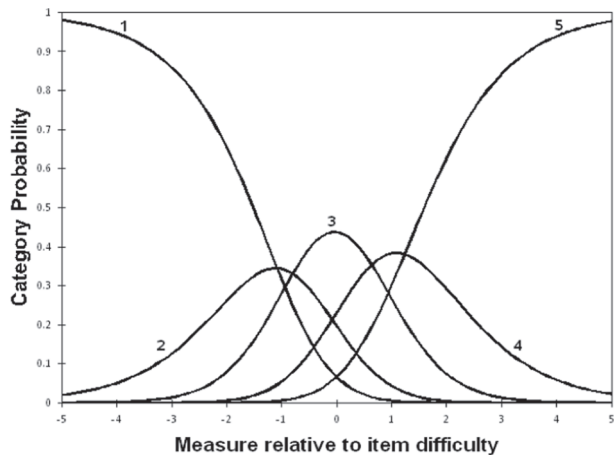

c) Child self-report

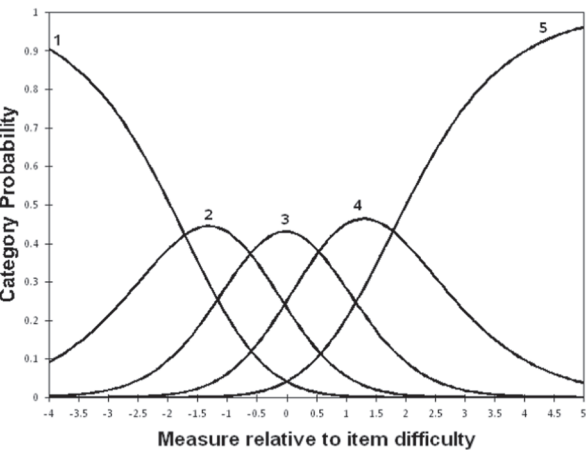

d) Parent proxy-report

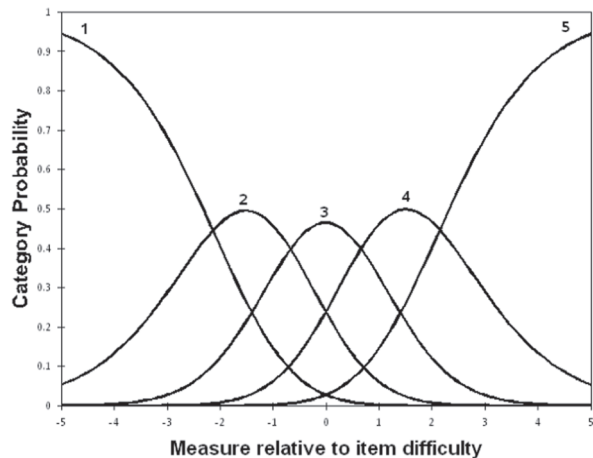

Supplement: MOESM1 [file 9558612]
